# Supplementary material
Source: PubMed Central journal article supplement (PMC3920923)
Supplement: Supp_Table1.pdf [file Supp_Table1.pdf]

## Supplementary Data

SUPPLEMENTARY TABLE S1. PRIMER SEQUENCES FOR RT-PCR AND REAL-TIME PCR

| <i>Genes</i>            | <i>Sense primer (5' to 3')</i> | <i>Antisense primer (5' to 3')</i> |
|-------------------------|--------------------------------|------------------------------------|
| Endo <i>Oct4</i>        | cacgagtggaagcaactca            | agatgggtggtctggctgaac              |
| Endo <i>Sox2</i>        | cacaactcggagatcagcaa           | ctccgggaagcgtgtactta               |
| Endo <i>c-Myc</i>       | gcccagtgaggatatctgga           | atcgcagtgaagctctggt                |
| Endo <i>Klf4</i>        | ctgaacagcagggactgtca           | gtgtgggtggctgttcttt                |
| <i>E-cadherin</i>       | caaggacagccttcttttcg           | tggacttcagcgtcactttg               |
| <i>Rex1</i>             | ggccagtccagaataccaga           | gaactcgcttcagaacctg                |
| <i>Nanog</i>            | attctgggaacgcctcatc            | gcttttgtttgggactggtag              |
| Endo <i>Oct4 (qPCR)</i> | ggcgttctctttgaaagggttc         | tgaaccacatccttctct                 |
| <i>Nanog (qPCR)</i>     | atgagtgtgggtcttctgggcc         | gactccaccaggtgaaatatga             |
| <i>Rex1 (qPCR)</i>      | ctttctgccaggttct               | atctctcgagccatc                    |
| <i>Gapdh</i>            | tgaaggtcgggtgtaacggat          | caggggggctaagcagttggt              |
